# Supplementary material for: Effective coefficient of diffusion and permeability of firn at Dome C and Lock In, Antarctica, and of various snow types – estimates over the 100–850 kg m −3 density range
Source: Copernicus journal article supplement (doi:10.5194/tc-16-967-2022), 2022-03-14
Supplement: Supplementary file 1 [file Deff_Keff_data.xlsx]

## Sheet: data
image_name	sample_type	image_dimension_x[vox]	image_dimension_y[vox]	image_dimension_z[vox]	image_resolution[µm]	depth[m]	density[kg/m3]	SSA[m2/kg]	correlation_length_x[mm]	correlation_length_y[mm]	correlation_length_z[mm]	closed_porosity[%]	connectivity_index[%]	permeability_x[m2]	permeability_y[m2]	permeability_z[m2]	normalized_diffusion_coefficient_x[-]	normalized_diffusion_coefficient_y[-]	normalized_diffusion_coefficient_z[-]
I01isonew_bwcor_512_0_grow	PP	512	512	512	4.91	0	102.904	55.7932	0.0574083	0.0559974	0.0546771	0	100	3.83319e-09	2.21988e-09	3.33422e-09	0.7541	0.762593	0.746822
03iso_600_bwliss	PP	600	600	600	4.91	0	123.337	41.3733	0.0638776	0.0641373	0.0647249	0	100	3.79119e-09	3.93217e-09	4.02549e-09	0.726675	0.742394	0.737583
04iso_1_600_bwliss	PP	600	600	600	4.91	0	113.433	42.4766	0.0646958	0.0630262	0.0605832	0	100	4.22825e-09	4.15691e-09	4.06337e-09	0.769564	0.765415	0.753713
fr140202_1192_auto	PP	1192	1192	1192	4.91	0	120.494	55.3042	0.0639824	0.0656092	0.0572651	0	100	3.58251e-09	3.7686e-09	3.68639e-09	0.726571	0.734386	0.707204
Ip03_600_512_cleaned_cor_0_grow	PP	512	512	512	8.48	0	134.55	50.9093	0.0552181	0.055498	0.046311	0	100	2.41839e-09	2.38499e-09	2.05616e-09	0.749239	0.749051	0.722462
Ip04_512_cleaned_cor_0_grow	DF	512	512	512	8.588	0	157.541	25.3564	0.100925	0.118855	0.0722898	0	100	6.13927e-09	6.37783e-09	4.62148e-09	0.72653	0.739707	0.658556
I08iso_512_bwliss_0_grow	DF	512	512	512	4.91	0	147.714	29.3157	0.0912227	0.0811162	0.0832562	0	100	4.60119e-09	4.37822e-09	4.78786e-09	0.738925	0.723053	0.720217
2011-04-06-3A__m1_s2_c1	DH	700	700	700	8.4	0	274.825	18.1756	0.128	0.133	0.143	0	100	2.98323e-09	2.88621e-09	3.08473e-09	0.499787	0.500226	0.529461
2011-04-05-4A__m1_s2_c1	DH	700	700	700	8.397	0	315.356	15.1862	0.146	0.147	0.174	0	100	2.70789e-09	2.61076e-09	3.18027e-09	0.429829	0.427545	0.476875
2011-05-15-5G__m1_s2_c1	DH	1000	1000	1000	9.655	0	284.087	14.8871	0.16	0.16	0.202	0	100	3.76802e-09	3.69585e-09	4.38714e-09	0.458829	0.458821	0.508863
2011-05-11-7G9m__m1_s2_c1_950*950*950_175-1124z	DH	950	950	950	9.672	0	311.23	13.4029	0.181	0.182	0.225	0	100	3.91598e-09	3.95469e-09	4.84211e-09	0.414839	0.414943	0.469784
grad3_m0_s0_c1	DH	600	600	600	10	0	369.184	16.3335	0.103957	0.0971734	0.144655	0	100	6.53155e-10	6.31217e-10	1.06385e-09	0.291528	0.287392	0.372463
15iso_600_bwliss	RG	600	600	600	4.91	0	172.763	23.3233	0.0922569	0.0939571	0.0967498	0	100	4.53548e-09	4.70339e-09	4.79199e-09	0.701436	0.705546	0.69681
19iso_600_bwliss	RG	600	600	600	4.91	0	192.478	19.8978	0.1027	0.109058	0.102572	0	100	4.73372e-09	4.8195e-09	4.83524e-09	0.67169	0.677162	0.668324
21iso_600_bwliss	RG	600	600	600	4.91	0	198.622	19.2312	0.114702	0.118709	0.111886	0	100	4.727e-09	4.93081e-09	4.36164e-09	0.667209	0.673719	0.649512
I23iso_2_512_0_grow	RG	512	512	512	4.91	0	256.301	17.1996	0.113078	0.11057	0.109763	0	100	2.81718e-09	2.62243e-09	2.47494e-09	0.589242	0.580529	0.566556
Ip06_512_cleaned_cor4	RG	512	512	512	6.158	0	354.512	21.5865	0.0731542	0.0761684	0.0680938	0	100	6.35043e-10	6.51133e-10	5.87673e-10	0.446745	0.453347	0.428194
Ip07b_512_cleaned_cor	RG	512	512	512	8.609	0	280.052	17.1459	0.126973	0.130903	0.0862256	0	100	2.44609e-09	2.44469e-09	1.8307e-09	0.55796	0.559218	0.478773
Ip08_512_cleaned_cor	RG	512	512	512	8.552	0	378.996	14.5718	0.116375	0.115195	0.0919743	0	100	1.08808e-09	1.08178e-09	9.55677e-10	0.421459	0.423446	0.380366
Ip09_512_cleaned_cor4	RG	512	512	512	6.158	0	396.144	12.2876	0.142797	0.13899	0.108554	0	100	1.26324e-09	1.28961e-09	1.03552e-09	0.392812	0.403399	0.354767
Ip10_512_cleaned_cor4_0_grow	RG	512	512	512	6.103	0	396.074	10.4631	0.154985	0.146737	0.154527	0	100	1.54936e-09	1.67928e-09	1.37748e-09	0.394373	0.392856	0.372906
Ip011_512_cleaned_cor4	RG	512	512	512	8.588	0	413.75	20.7645	0.0791037	0.0793144	0.0702011	0	100	4.5588e-10	4.49079e-10	4.00794e-10	0.374231	0.372159	0.350239
050512_14_600_cleaned_cor	RG	600	600	600	6.154	0	352.678	18.1331	0.0946575	0.0939386	0.0854128	0	100	8.97396e-10	8.83951e-10	8.04054e-10	0.440097	0.437587	0.425216
Ip15_512_cleaned_cor4	RG	512	512	512	6.158	0	315.54	16.0897	0.115074	0.0973566	0.115448	0	100	1.54173e-09	1.54173e-09	1.73473e-09	0.50591	0.470475	0.499362
2011-04-05-0A__m1_s2_c1_700x700x700_250-949z	RG	700	700	700	8.392	0	314.806	27.6424	0.07	0.073	0.066	0	100	7.58365e-10	7.80718e-10	6.97425e-10	0.479718	0.487593	0.468026
2011-04-06-1A__m1_s2_c1_240-939z_700	RG	700	700	700	8.395	0	275.008	23.3716	0.095	0.098	0.091	0	100	1.74848e-09	1.74404e-09	1.63911e-09	0.5389	0.541772	0.530581
090701_NH0__0_cleaned_cor2_651z	RG	651	651	651	8.609	0	431.357	17.343	0.0834694	0.0821622	0.0811514	0	100	4.53442e-10	4.41844e-10	4.33682e-10	0.349998	0.347533	0.341208
E2bis_bw_1200_450-1649	FC	1200	1200	1200	4.91	0	262.744	15.4312	0.160467	0.164665	0.180298	0	100	5.71045e-09	4.87497e-09	5.6228e-09	0.550143	0.54201	0.565511
2011-04-05-2A__m1_s2_c1_700*700*700_150-849z	FC	700	700	700	8.373	0	282.711	20.7458	0.104	0.109	0.112	0	100	1.9517e-09	1.95192e-09	2.01693e-09	0.505754	0.50985	0.524623
090630_NH1__0_cleaned_cor2_651z	MF	651	651	651	8.609	0	544.081	6.9884	0.172239	0.16843	0.179256	0	100	4.83673e-10	4.46338e-10	4.80154e-10	0.181572	0.163526	0.17441
090701_NH12__0_cleaned_cor3_651z	MF	651	651	651	8.59	0	512.895	7.68522	0.15957	0.161666	0.158908	0	100	7.46292e-10	7.47867e-10	7.44343e-10	0.239466	0.23733	0.234911
090701_NH2__0_cleaned_cor2_651z	MF	651	651	651	8.59	0	502.601	6.18192	0.180377	0.189469	0.204483	0	100	1.21973e-09	1.21939e-09	1.27296e-09	0.245711	0.252275	0.259994
090701_NH3__0_cleaned_cor2_651z	MF	651	651	651	8.609	0	495.109	5.24945	0.218899	0.22634	0.244155	0	100	1.79967e-09	1.88267e-09	1.72676e-09	0.262069	0.260595	0.256489
2011-05-13-NH5G__m4_s5_c1	MF	1000	1000	1000	9.46	0	472.834	3.78161	0.328222	0.323261	0.355564	0	100	3.96219e-09	4.57153e-09	4.8717e-09	0.274975	0.278856	0.291074
chamair600liss_20_561	MF	542	542	542	10	0	522.311	8.49498	0.138462	0.133628	0.13323	0	100	5.68072e-10	5.11841e-10	5.37758e-10	0.241233	0.230136	0.22978
vostok_bh8_80inversetotal_600_Complementaire	firn	600	600	600	10	80	774.605	1.4877	0.279156	0.265094	0.315422	4.34	91.48	4.57751e-11	4.67101e-11	1.04696e-10	0.0132147	0.0138186	0.0222428
DomeC_23 m	firn	560	560	901	12	23	565.785	2.89459	0.3768	0.3804	0.4368	0.0389293	99.9591	1.1149e-09	1.03881e-09	1.3812e-09	0.181	0.179	0.208
DomeC_38 m_c1	firn	448	448	701	15	38	618.641	1.90812	0.5055	0.495	0.5415	0.251147	99.6856	1.13245e-09	1.19865e-09	1.55354e-09	0.113	0.118	0.138
DomeC_51 m	firn	560	560	1751	12	51	674.435	1.79323	0.5412	0.5388	0.564	0.353272	99.4978	6.57358e-10	4.95233e-10	6.01681e-10	0.075	0.071	0.0784
DomeC_60 m-old-s	firn	560	560	1751	12	60	718.118	1.60514	0.5244	0.5424	0.5808	0.943385	98.396	3.45705e-10	3.41263e-10	3.72195e-10	0.0505829	0.049472	0.0519653
DomeC_70 m	firn	560	560	1901	12	70	752.621	1.45331	0.5148	0.5232	0.582	0.781557	97.8449	1.38823e-10	1.35791e-10	1.55701e-10	0.0251503	0.0229916	0.024064
DomeC_80 m_c2_0	firn	448	448	901	15	80	784.646	1.2237	0.5055	0.495	0.5415	1.26739	91.3493	4.90567e-11	5.31033e-11	5.23351e-11	0.00641515	0.00534428	0.00913932
DomeC_86 m	firn	560	560	1501	12	86	807.699	1.06231	0.504	0.4692	0.5148	3.79968	71.9076	1.20722e-11	1.96959e-11	3.14062e-11	0.000583163	0.00284141	0.00451266
DomeC_91 m-1-ter	firn	560	560	1901	12	91	815.647	1.08897	0.426	0.4056	0.4632	7.75952	35.9183	1.5425e-11	1.11031e-11	1.54817e-11	0.000330101	0.000418254	0.00110971
DomeC_95 m	firn	560	560	2051	12	95	829.363	0.930647	0.4764	0.4788	0.492	15.5492	11.7391	0	0	0	0	0	0
DomeC_96 m	firn	560	560	2001	12	96	836.441	0.867867	0.4848	0.516	0.5016	21.9274	10.7228	0	0	0	0	0	0
DomeC_98 m-1	firn	560	560	1751	12	98	837.679	0.849361	0.4656	0.498	0.5196	30.1614	10.1528	0	0	0	0	0	0
DomeC_101 m	firn	560	560	1151	12	101	848.747	0.800152	0.4308	0.4716	0.4884	27.609	5.20213	0	0	0	0	0	0
DomeC_133 m	firn	560	560	1601	12	133	887.654	0.429968	0.3648	0.5004	0.4152	73.8634	2.2861	0	0	0	0	0	0
lockin_66m	firn	560	560	1701	12	66	719.534	1.96607	0.3876	0.3912	0.4452	0.0647502	99.7955	1.99393e-10	2.27639e-10	2.78202e-10	0.0456206	0.049616	0.0582573
lockin_83m	firn	560	560	1901	12	83	784.297	1.40661	0.4296	0.4356	0.4488	0.706687	95.3804	3.9426e-11	4.12007e-11	5.33263e-11	0.0078421	0.00749095	0.00934099
lockin_87m	firn	560	560	2001	12	87	797.609	1.32707	0.4608	0.4296	0.4212	1.20888	89.422	2.71617e-11	2.88423e-11	2.83123e-11	0.00479102	0.00531427	0.00544952
lockin_93m	firn	560	560	1501	12	93	813.172	1.22501	0.4056	0.3876	0.4476	6.37209	75.4251	1.49151e-11	1.54081e-11	2.18275e-11	0.00294435	0.00124242	0.00239126
lockin_97m	firn	560	560	1751	12	97	825.598	1.10028	0.396	0.4404	0.4032	4.7662	34.8166	1.32625e-11	8.04724e-12	9.10128e-12	0.00216944	0.000441215	0.000737469
lockin_100m	firn	560	560	1701	12	100	832.497	1.06789	0.3516	0.366	0.3888	13.3903	33.6558	3.39262e-12	5.12398e-12	3.32661e-12	0.00016906	0.0003964	1.07992e-05
lockin_103m	firn	560	560	1851	12	103	832.932	1.07175	0.3456	0.3708	0.3924	30.5194	11.4466	0	4.35307e-12	5.06813e-12	0	0.000222953	0.000917806
lockin_106m	firn	560	560	1851	12	106	844.484	0.934308	0.3816	0.3792	0.3948	30.7425	6.96484	0	0	3.181e-12	0	0	0.000248008
lockin_108m	firn	560	560	1551	12	108	852.078	0.823825	0.4584	0.4392	0.4464	36.2223	3.04385	0	0	0	0	0	0
lockin_113m	firn	560	560	1701	12	113	855.436	0.821415	0.3696	0.348	0.426	49.339	4.2066	0	0	0	0	0	0
lockin_110m	firn	560	560	1801	12	110	855.807	0.865566	0.33	0.3444	0.3744	56.6582	2.2271	0	0	0	0	0	0
lockin_116m	firn	560	560	1901	12	116	861.13	0.76279	0.378	0.4152	0.3612	51.8772	1.97079	0	0	0	0	0	0
lockin_120m	firn	560	560	1801	12	120	870.042	0.668518	0.3504	0.3504	0.3876	60.1882	1.62411	0	0	0	0	0	0
