# Supplementary material for: Effective coefficient of diffusion and permeability of firn at Dome C and Lock In, Antarctica, and of various snow types – estimates over the 100–850 kg m −3 density range
Source: Copernicus journal article supplement (doi:10.5194/tc-16-967-2022), 2022-03-14
Supplement: Supplementary file 1 [file tc-16-967-2022-supplement.zip]

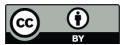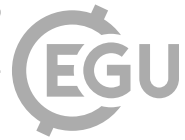

*Supplement of*

**Effective coefficient of diffusion and permeability of firn at Dome C and Lock In, Antarctica, and of various snow types – estimates over the 100–850 kg m<sup>-3</sup> density range**

**Neige Calonne et al.**

*Correspondence to:* Neige Calonne (neige.calonne@meteo.fr)

- tc-16-967-2022-supplement-title-page.pdf
- Deff\_Keff\_data.xlsx

The copyright of individual parts of the supplement might differ from the article licence.
