# Supplementary material for: Effective coefficient of diffusion and permeability of firn at Dome C and Lock In, Antarctica, and of various snow types – estimates over the 100–850 kg m −3 density range
Source: Copernicus journal article supplement (doi:10.5194/tc-16-967-2022), 2022-03-14
Supplement: Supplementary file 2 [file tc-16-967-2022-supplement.zip]

Archive with 2 entries (2 files):
- tc-16-967-2022-supplement-title-page.pdf
- Deff_Keff_data.xlsx
